# Supplementary material
Source: publisher figshare collection journal article supplement (https://frontiersin.figshare.com/ndownloader/files/14392907)
Supplement: Supplementary file [file 14392907]

# Supp. Fig. S3

A

|                      | CHD6   |       | Ribosomal 5S<br>pseudogene |       | GAPDH  |       | CLE    |       |
|----------------------|--------|-------|----------------------------|-------|--------|-------|--------|-------|
|                      | Mean   | STDEV | Mean                       | STDEV | Mean   | STDEV | Mean   | STDEV |
| <b>CBD (Cts)</b>     | 26.983 | 0.007 | 18.704                     | 0.046 | 11.893 | 0.027 | 24.151 | 0.058 |
| <b>CLE-CBD (Cts)</b> | 26.642 | 0.204 | 18.887                     | 0.029 | 7.027  | 0.059 | 16.898 | 0.004 |
| <b>Ct Difference</b> | 0.341  |       | -0.183                     |       | 4.865  |       | 7.253  |       |

B

Relative mRNA abundance hCLE-CBD (1/Ct) / CBD (1/Ct)

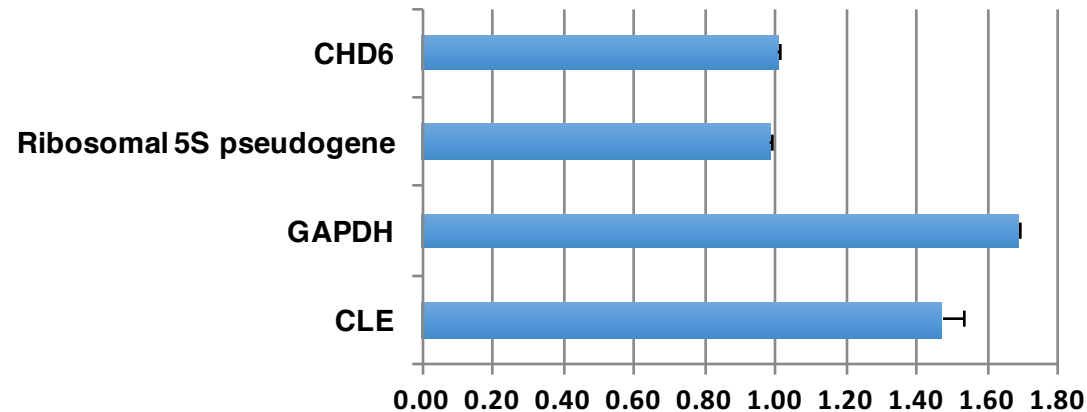

**Supp. Fig. S3. Validation of RNAs bound to purified hCLE-CBD.** RNAs bound to CBD or hCLE-CBD were used for qRT-PCR to detect the abundance of non-associated (CHD6 and Ribosomal 5S pseudogene) or associated (GAPDH and hCLE) mRNAs to purified CLE-CBD. A). Table showing the Ct amplification of the selected mRNAs in CBD and CLE-CBD RNAs. Mean and standard deviation of three independent measures is represented. B). Diagram showing relative abundance of each mRNAs taking as 1.00 the 1/Ct values found in the CBD sample.
